# Supplementary material for: Altered Structural Covariance of Insula, Cerebellum and Prefrontal Cortex Is Associated with Somatic Symptom Levels in Irritable Bowel Syndrome (IBS)
Source: MDPI journal article supplement (doi:10.3390/brainsci11121580), 2021-11-29
Supplement: s1 [file s1]

| Node No | Destrieux et al No | Short name subregion | Full name of subregion                                                 | Region of interest      | Functional subdivision of PFC |
|---------|--------------------|----------------------|------------------------------------------------------------------------|-------------------------|-------------------------------|
| 1       |                    | L_CeB_V              | Left Cerebellum Cortex                                                 | Cerebellum              |                               |
| 2       |                    | L_Tha_V              | Left Thalamus Proper                                                   | Thalamus                |                               |
| 3       |                    | L_Pu_V               | Left Putamen                                                           | Putamen                 |                               |
| 4       |                    | L_Hip_V              | Left Hippocampus                                                       | Hippocampus             |                               |
| 5       |                    | L_Amg_V              | Left Amygdala                                                          | Amygdala                |                               |
| 6       |                    | R_CeB_V              | Right Cerebellum Cortex                                                | Cerebellum              |                               |
| 7       |                    | R_Tha_V              | Right Thalamus Proper                                                  | Thalamus                |                               |
| 8       |                    | R_Pu_V               | Right Putamen                                                          | Putamen                 |                               |
| 9       |                    | R_Hip_V              | Right Hippocampus                                                      | Hippocampus             |                               |
| 10      |                    | R_Amg_V              | Right Amygdala                                                         | Amygdala                |                               |
| 11      | 1                  | L_FMarG_S_V          | Left Fronto-marginal gyrus (of Wernicke) and sulcus                    | PFC                     | Frontal pole                  |
| 12      | 5                  | L_TrFPoG_S_V         | Left Transverse frontopolar gyri and sulcus                            | PFC                     | Frontal pole                  |
| 13      | 6                  | L_ACgG_S_V           | Left Anterior part of the cingulate gyrus and sulcus (ACC)             | ACC                     |                               |
| 14      | 7                  | L_MACgG_S_V          | Left Middle-anterior part of the cingulate gyrus and sulcus (aMCC)     | aMCC                    |                               |
| 15      | 8                  | L_MPosCgG_S_V        | Left Middle-posterior part of the cingulate gyrus and sulcus (pMCC)    | pMCC                    |                               |
| 16      | 12                 | L_InfFGOpp_V         | Left Opercular part of the inferior frontal gyrus                      | PFC                     |                               |
| 17      | 13                 | L_InfFGOrp_V         | Left Orbital part of the inferior frontal gyrus                        | PFC                     | vIPFC                         |
| 18      | 14                 | L_InfFGTrip_V        | Left Triangular part of the inferior frontal gyrus                     | PFC                     |                               |
| 19      | 15                 | L_MFG_V              | Left Middle frontal gyrus (F2)                                         | PFC                     | dIPFC                         |
| 20      | 16                 | L_SupFG_V            | Left Superior frontal gyrus (F1)                                       | PFC                     | vmPFC/dmPFC/SMA               |
| 21      | 17                 | L_LoInG_CInS_V       | Left Long insular gyrus and central sulcus of the insula               | mpINS                   |                               |
| 22      | 18                 | L_ShoInG_V           | Left Short insular gyri                                                | aINS                    |                               |
| 23      | 24                 | L_OrG_V              | Left Orbital gyri                                                      | PFC                     | IOFC                          |
| 24      | 25                 | L_AngG_V             | Left Angular gyrus                                                     | Inferior parietal lobe  |                               |
| 25      | 26                 | L_SuMarG_V           | Left Supramarginal gyrus                                               | Inferior parietal lobe  |                               |
| 26      | 28                 | L_PosCG_V            | Left Postcentral gyrus                                                 | Postcentral gyrus       |                               |
| 27      | 29                 | L_PRCG_V             | Left Precentral gyrus                                                  | Precentral gyrus        |                               |
| 28      | 31                 | L_RG_V               | Left Straight gyrus, Gyrus rectus                                      | PFC                     | mOFC                          |
| 29      | 34                 | L_SupTGLp_V          | Left Lateral aspect of the superior temporal gyrus                     | Superior temporal gyrus |                               |
| 30      | 35                 | L_PoPl_V             | Left Planum polare of the superior temporal gyrus                      | Superior temporal gyrus |                               |
| 31      | 36                 | L_TPl_V              | Left Planum temporale or temporal plane of the superior temporal gyrus | Superior temporal gyrus |                               |

| <b>Node No</b> | <b>Destrieux et al No</b> | <b>Short name subregion</b> | <b>Full name of subregion</b>                                                    | <b>Region of interest</b>          | <b>Functional subdivision of PFC</b> |
|----------------|---------------------------|-----------------------------|----------------------------------------------------------------------------------|------------------------------------|--------------------------------------|
| 32             | 39                        | L_ALSHorp_V                 | Left Horizontal ramus of the anterior segment of the lateral sulcus (or fissure) | PFC                                |                                      |
| 33             | 40                        | L_ALSVerp_V                 | Left Vertical ramus of the anterior segment of the lateral sulcus (or fissure)   | PFC                                |                                      |
| 34             | 41                        | L_PosLS_V                   | Left Posterior ramus (or segment) of the lateral sulcus (or fissure)             | Inferior parietal lobe             |                                      |
| 35             | 45                        | L_CS_V                      | Left Central sulcus (Rolando's fissure)                                          | Between Pre- and Postcentral gyrus |                                      |
| 36             | 47                        | L_ACirIns_V                 | Left Anterior segment of the circular sulcus of the insula                       | aINS                               |                                      |
| 37             | 48                        | L_InfCirIns_V               | Left Inferior segment of the circular sulcus of the insula                       | pINS                               |                                      |
| 38             | 49                        | L_SupCirIns_V               | Left Superior segment of the circular sulcus of the insula                       | mINS                               |                                      |
| 39             | 52                        | L_InfFS_V                   | Left Inferior frontal sulcus                                                     | PFC                                |                                      |
| 40             | 53                        | L_MFS_V                     | Left Middle frontal sulcus                                                       | PFC                                |                                      |
| 41             | 54                        | L_SupFS_V                   | Left Superior frontal sulcus                                                     | PFC                                |                                      |
| 42             | 55                        | L_JS_V                      | Left Sulcus intermedius primus (of Jensen)                                       | Inferior parietal lobe             |                                      |
| 43             | 56                        | L_IntPS_TrPS_V              | Left Intraparietal sulcus (interparietal sulcus) and transverse parietal sulci   | Inferior parietal lobe             |                                      |
| 44             | 62                        | L_LORs_V                    | Left Lateral orbital sulcus                                                      | PFC                                | OFC                                  |
| 45             | 63                        | L_MedOrS_V                  | Left Medial orbital sulcus (olfactory sulcus)                                    | PFC                                | OFC                                  |
| 46             | 64                        | L_OrS_V                     | Left Orbital sulci (H-shaped sulci)                                              | PFC                                | OFC                                  |
| 47             | 66                        | L_PerCaS_V                  | Left Pericallosal sulcus (S of corpus callosum)                                  | ACC/MCC                            |                                      |
| 48             | 70                        | L_SbOrS_V                   | Left Suborbital sulcus (sulcus rostrales, supraorbital sulcus)                   | PFC                                | OFC                                  |
| 49             | 73                        | L_SupTS_V                   | Left Superior temporal sulcus (parallel sulcus)                                  | Superior temporal                  |                                      |
| 50             | 74                        | L_TrTs_V                    | Left Transverse temporal sulcus                                                  | Superior temporal                  |                                      |
| 51             | 1                         | R_FMarG_S_V                 | Right Fronto-marginal gyrus (of Wernicke) and sulcus                             | PFC                                | Frontal pole                         |
| 52             | 5                         | R_TrFPoG_S_V                | Right Transverse frontopolar gyri and sulcus                                     | PFC                                | Frontal pole                         |
| 53             | 6                         | R_ACgG_S_V                  | Right Anterior part of the cingulate gyrus and sulcus (ACC)                      | ACC                                |                                      |
| 54             | 7                         | R_MACgG_S_V                 | Right Middle-anterior part of the cingulate gyrus and sulcus (aMCC)              | aMCC                               |                                      |
| 55             | 8                         | R_MPosCgG_S_V               | Right Middle-posterior part of the cingulate gyrus and sulcus (pMCC)             | pMCC                               |                                      |
| 56             | 12                        | R_InfFGOpp_V                | Right Opercular part of the inferior frontal gyrus                               | PFC                                |                                      |
| 57             | 13                        | R_InfFGOrp_V                | Right Orbital part of the inferior frontal gyrus                                 | PFC                                | vIPFC                                |
| 58             | 14                        | R_InfFGTrip_V               | Right Triangular part of the inferior frontal gyrus                              | PFC                                |                                      |
| 59             | 15                        | R_MFG_V                     | Right Middle frontal gyrus (F2)                                                  | PFC                                | dIPFC                                |
| 60             | 16                        | R_SupFG_V                   | Right Superior frontal gyrus (F1)                                                | PFC                                | vmPFC/dmPFC/SMA                      |
| 61             | 17                        | R_LoInG_CInS_V              | Right Long insular gyrus and central sulcus of the insula                        | mpINS                              |                                      |

| <b>Node No</b> | <b>Destrieux et al No</b> | <b>Short name subregion</b> | <b>Full name of subregion</b>                                                   | <b>Region of interest</b>          | <b>Functional subdivision of PFC</b> |
|----------------|---------------------------|-----------------------------|---------------------------------------------------------------------------------|------------------------------------|--------------------------------------|
| 62             | 18                        | R_ShoInG_V                  | Right Short insular gyri                                                        | aINS                               |                                      |
| 63             | 24                        | R_OrG_V                     | Right Orbital gyri                                                              | PFC                                | IOFC                                 |
| 64             | 25                        | R_AngG_V                    | Right Angular gyrus                                                             | Inferior parietal lobe             |                                      |
| 65             | 26                        | R_SuMarG_V                  | Right Supramarginal gyrus                                                       | Inferior parietal lobe             |                                      |
| 66             | 28                        | R_PosCG_V                   | Right Postcentral gyrus                                                         | Postcentral gyrus                  |                                      |
| 67             | 29                        | R_PRCG_V                    | Right Precentral gyrus                                                          | Precentral gyrus                   |                                      |
| 68             | 31                        | R_RG_V                      | Right Straight gyrus, Gyrus rectus                                              | PFC                                | mOFC                                 |
| 69             | 34                        | R_SupTGLp_V                 | Right Lateral aspect of the superior temporal gyrus                             | Superior temporal gyrus            |                                      |
| 70             | 35                        | R_PoPl_V                    | Right Planum polare of the superior temporal gyrus                              | Superior temporal gyrus            |                                      |
| 71             | 36                        | R_TPl_V                     | Right Planum temporale or temporal plane of the superior temporal gyrus         | Superior temporal gyrus            |                                      |
| 72             | 39                        | R_ALSHorp_V                 | Right Horizontal ramus of the anterior segment of the lateral sulcus            | PFC                                |                                      |
| 73             | 40                        | R_ALSVerp_V                 | Right Vertical ramus of the anterior segment of the lateral sulcus              | PFC                                |                                      |
| 74             | 41                        | R_PosLS_V                   | Right Posterior ramus (or segment) of the lateral sulcus (or fissure)           | Inferior parietal lobe             |                                      |
| 75             | 45                        | R_CS_V                      | Right Central sulcus (Rolando's fissure)                                        | Between Pre- and Postcentral gyrus |                                      |
| 76             | 47                        | R_ACirIns_V                 | Right Anterior segment of the circular sulcus of the insula                     | aINS                               |                                      |
| 77             | 48                        | R_InfCirIns_V               | Right Inferior segment of the circular sulcus of the insula                     | pINS                               |                                      |
| 78             | 49                        | R_SupCirInS_V               | Right Superior segment of the circular sulcus of the insula                     | mINS                               |                                      |
| 79             | 52                        | R_InfFS_V                   | Right Inferior frontal sulcus                                                   | PFC                                |                                      |
| 80             | 53                        | R_MFS_V                     | Right Middle frontal sulcus                                                     | PFC                                |                                      |
| 81             | 54                        | R_SupFS_V                   | Right Superior frontal sulcus                                                   | PFC                                |                                      |
| 82             | 55                        | R_JS_V                      | Right Sulcus intermedius primus (of Jensen)                                     | Inferior parietal lobe             |                                      |
| 83             | 56                        | R_IntPS_TrPS_V              | Right Intraparietal sulcus (interparietal sulcus) and transverse parietal sulci | Inferior parietal lobe             |                                      |
| 84             | 62                        | R_LORs_V                    | Right Lateral orbital sulcus                                                    | PFC                                | OFC                                  |
| 85             | 63                        | R_MedOrS_V                  | Right Medial orbital sulcus (olfactory sulcus)                                  | PFC                                | OFC                                  |
| 86             | 64                        | R_OrS_V                     | Right Orbital sulci (H-shaped sulci)                                            | PFC                                | OFC                                  |
| 87             | 66                        | R_PerCaS_V                  | Right Pericallosal sulcus (S of corpus callosum)                                | ACC/MCC                            |                                      |
| 88             | 70                        | R_SbOrS_V                   | Right Suborbital sulcus (sulcus rostrales, supraorbital sulcus)                 | PFC                                | OFC                                  |
| 89             | 73                        | R_SupTS_V                   | Right Superior temporal sulcus (parallel sulcus)                                | Superior temporal                  |                                      |
| 90             | 74                        | R_TrTs_V                    | Right Transverse temporal sulcus                                                | Superior temporal                  |                                      |

Supplementary Table S1: Nomenclature

| HC < IBS low somatization |             |                  |           |                |                        |         |           |         |
|---------------------------|-------------|------------------|-----------|----------------|------------------------|---------|-----------|---------|
| node no 1                 | node name 1 | ROI              | node no 2 | node name 2    | ROI                    | Z_HC    | Z_IBS_low | p-value |
| 2                         | L_Tha_V     | Thalamus         | 43        | L_IntPS_TrPS_V | Inferior parietal lobe | -0,4291 | 0,4998    | 0,0002  |
| 7                         | R_Tha_V     | Thalamus         | 85        | R_MedOrS_V     | PFC (OFC)              | -0,571  | 0,1446    | 0,0006  |
| 9                         | R_Hip_V     | Hippocampus      | 17        | L_InfFGOrp_V   | PFC (vlPFC)            | -0,664  | 0,2899    | 0,0002  |
| 27                        | L_PRCG_V    | Precentral gyrus | 41        | L_SupFS_V      | PFC                    | -0,1265 | 0,7888    | 0,0002  |
| 40                        | L_MFS_V     | PFC              | 85        | R_MedOrS_V     | PFC (OFC)              | -0,5613 | 0,231     | 0,0004  |
| 60                        | R_SupFG_V   | vmPFC/dmPFC/SMA  | 63        | R_OrG_V        | PFC (IOFC)             | -0,2747 | 0,4259    | 0,0008  |
| 68                        | R_RG_V      | PFC (mOFC)       | 69        | R_SupTGLp_V    | Superior temporal      | -0,4714 | 0,4499    | 0,0006  |

Supplementary Table S2: Connectivity HC < IBS low somatization significant at  $p < 0.001$ . Differences based on Fisher r-to-z-transformed bivariate Pearson correlations; significance levels based on permutation labeling with 5000 randomizations.

| HC > IBS low somatization |                |                        |           |             |             |        |           |         |
|---------------------------|----------------|------------------------|-----------|-------------|-------------|--------|-----------|---------|
| node no 1                 | node name 1    | ROI                    | node no 2 | node name 2 | ROI         | Z_HC   | Z_IBS_low | p-value |
| 28                        | L_RG_V         | PFC (mOFC)             | 59        | R_MFG_V     | PFC (dlPFC) | 0,6716 | -0,2629   | 0,0008  |
| 83                        | R_IntPS_TrPS_V | Inferior parietal lobe | 85        | R_MedOrS_V  | PFC (OFC)   | 0,5587 | -0,4708   | 0,0002  |

Supplementary Table S3: Connectivity HC > IBS low somatization significant at  $p < 0.001$ . Differences based on Fisher r-to-z-transformed bivariate Pearson correlations; significance levels based on permutation labeling with 5000 randomizations.

| HC < IBS high somatization |               |                    |           |                |                                    |         |            |         |
|----------------------------|---------------|--------------------|-----------|----------------|------------------------------------|---------|------------|---------|
| node no 1                  | node name 1   | ROI                | node no 2 | node name 2    | ROI                                | Z_HC    | Z_IBS_high | p-value |
| 11                         | L_FMarG_S_V   | PFC (frontal pole) | 83        | R_IntPS_TrPS_V | Inferior parietal                  | -0,3469 | 0,4711     | 0,0006  |
| 18                         | L_InfFGTrip_V | PFC                | 23        | L_OrG_V        | PFC (IOFC)                         | -0,7239 | 0,0403     | 0,0004  |
| 20                         | L_SupFG_V     | vmPFC/dmPFC/SMA    | 54        | R_MACgG_S_V    | aMCC                               | -0,1519 | 0,4431     | 0,0002  |
| 45                         | L_MedOrS_V    | PFC (OFC)          | 75        | R_CS_V         | Between pre- and postcentral gyrus | -0,4462 | 0,2417     | 0,0004  |
| 52                         | R_TrFPoG_S_V  | PFC (frontal pole) | 63        | R_OrG_V        | PFC (IOFC)                         | -0,3324 | 0,5601     | 0,0002  |
| 52                         | R_TrFPoG_S_V  | PFC (frontal pole) | 83        | R_IntPS_TrPS_V | Inferior parietal                  | -0,4113 | 0,493      | 0,0008  |
| 55                         | R_MPosCgG_S_V | pMCC               | 77        | R_InfCirlns_V  | pINS                               | -0,2828 | 0,5291     | 0,0004  |
| 57                         | R_InfFGOrp_V  | PFC (vlPFC)        | 65        | R_SuMarG_V     | Inferior parietal                  | -0,3209 | 0,3445     | 0,0008  |
| 67                         | R_PRCG_V      | Precentral gyrus   | 76        | R_ACirlns_V    | aINS                               | -0,3492 | 0,4431     | 0,0008  |

Supplementary Table S4: Connectivity HC < IBS high somatization significant at  $p < 0.001$ . Differences based on Fisher r-to-z-transformed bivariate Pearson correlations; significance levels based on permutation labeling with 5000 randomizations.

| HC > IBS high somatization |             |                        |           |                |                 |        |            |         |
|----------------------------|-------------|------------------------|-----------|----------------|-----------------|--------|------------|---------|
| node no 1                  | node name 1 | ROI                    | node no 2 | node name 2    | ROI             | Z_HC   | Z_IBS_high | p-value |
| 6                          | R_CeB_V     | Cerebellum             | 20        | L_SupFG_V      | vmPFC/dmPFC/SMA | 0,076  | -0,6709    | 0,0008  |
| 13                         | L_ACgG_S_V  | ACC                    | 16        | L_InfFGOpp_V   | PFC             | 0,6127 | -0,2131    | 0,0002  |
| 19                         | L_MFG_V     | PFC (dlPFC)            | 62        | R_ShoInG_V     | PFC (IOFC)      | 0,2815 | -0,5834    | 0,0002  |
| 20                         | L_SupFG_V   | vmPFC/dmPFC/SMA        | 61        | R_LoInG_CInS_V | mplINS          | 0,4072 | -0,1978    | 0,0004  |
| 24                         | L_AngG_V    | Inferior parietal lobe | 47        | L_PerCaS_V     | ACC/MCC         | 0,6653 | -0,0448    | 0,0006  |
| 71                         | R_TPI_V     | Superior temporal      | 79        | R_InfFS_V      | PFC             | 0,5275 | -0,3533    | 0,0008  |

Supplementary Table S5: Connectivity HC > IBS high somatization significant at  $p < 0.001$ . Differences based on Fisher r-to-z-transformed bivariate Pearson correlations; significance levels based on permutation labeling with 5000 randomizations.

| IBS low somatization |               |          | IBS high somatization |               |          | Healthy controls |                |          |
|----------------------|---------------|----------|-----------------------|---------------|----------|------------------|----------------|----------|
| Node no              | Node name     | Hubscore | Node no               | Node name     | Hubscore | Node no          | Node name      | Hubscore |
| 22                   | L_ShoInG_V    | 4        | 18                    | L_InfFGTrip_V | 4        | 22               | L_ShoInG_V     | 4        |
| 58                   | R_InfFGTrip_V | 4        | 58                    | R_InfFGTrip_V | 4        | 38               | L_SupCirInS_V  | 4        |
| 8                    | R_Pu_V        | 3        | 60                    | R_SupFG_V     | 4        | 62               | R_ShoInG_V     | 4        |
| 13                   | L_ACgG_S_V    | 3        | 63                    | R_OrG_V       | 4        | 8                | R_Pu_V         | 3        |
| 18                   | L_InfFGTrip_V | 3        | 20                    | L_SupFG_V     | 3        | 52               | R_TrFPoG_S_V   | 3        |
| 23                   | L_OrG_V       | 3        | 46                    | L_OrS_V       | 3        | 61               | R_LoInG_CInS_V | 3        |
| 41                   | L_SupFS_V     | 3        | 54                    | R_MACgG_S_V   | 3        | 67               | R_PRCG_V       | 3        |
| 56                   | R_InfFGOpp_V  | 3        | 59                    | R_MFG_V       | 3        | 3                | L_Pu_V         | 2        |
| 60                   | R_SupFG_V     | 3        | 79                    | R_InfFS_V     | 3        | 12               | L_TrFPoG_S_V   | 2        |
| 78                   | R_SupCirInS_V | 3        | 8                     | R_Pu_V        | 2        | 13               | L_ACgG_S_V     | 2        |
| 1                    | L_CeB_V       | 2        | 11                    | L_FMarG_S_V   | 2        | 16               | L_InfFGOpp_V   | 2        |
| 16                   | L_InfFGOpp_V  | 2        | 23                    | L_OrG_V       | 2        | 43               | L_IntPS_TrPS_V | 2        |
| 19                   | L_MFG_V       | 2        | 33                    | L_ALSVerp_V   | 2        | 58               | R_InfFGTrip_V  | 2        |
| 33                   | L_ALSVerp_V   | 2        | 34                    | L_PosLS_V     | 2        | 71               | R_TPI_V        | 2        |
| 35                   | L_CS_V        | 2        | 38                    | L_SupCirInS_V | 2        | 78               | R_SupCirInS_V  | 2        |
| 47                   | L_PerCaS_V    | 2        | 41                    | L_SupFS_V     | 2        | 79               | R_InfFS_V      | 2        |
| 59                   | R_MFG_V       | 2        | 52                    | R_TrFPoG_S_V  | 2        | 80               | R_MFS_V        | 2        |
| 65                   | R_SuMarG_V    | 2        | 53                    | R_ACgG_S_V    | 2        | 86               | R_OrS_V        | 2        |
| 85                   | R_MedOrS_V    | 2        | 55                    | R_MPosCgG_S_V | 2        |                  |                |          |
|                      |               |          | 76                    | R_ACirIns_V   | 2        |                  |                |          |
|                      |               |          | 81                    | R_SupFS_V     | 2        |                  |                |          |
|                      |               |          | 86                    | R_OrS_V       | 2        |                  |                |          |

Supplementary Table S6: Hub scores

| IBS low somatization |         |                |                                    | IBS high somatization |         |                |                        | HC       |         |                |                        |
|----------------------|---------|----------------|------------------------------------|-----------------------|---------|----------------|------------------------|----------|---------|----------------|------------------------|
| module               | node no | Node name      | Region                             | module                | node no | Node name      | Region                 | module   | node no | Node name      | Region                 |
| module 1             | 1       | L_CeB_V        | Cerebellum                         | module 1              | 1       | L_CeB_V        | Cerebellum             | module 1 | 1       | L_CeB_V        | Cerebellum             |
|                      | 6       | R_CeB_V        | Cerebellum                         |                       | 6       | R_CeB_V        | Cerebellum             |          | 6       | R_CeB_V        | Cerebellum             |
|                      |         |                |                                    |                       | 12      | L_TrFPoG_S_V   | PFC                    |          | 65      | R_SuMarG_V     | Inferior parietal lobe |
| module 2             | 2       | L_Tha_V        | Thalamus                           | module 2              | 2       | L_Tha_V        | Thalamus               | module 2 | 2       | L_Tha_V        | Thalamus               |
|                      | 7       | R_Tha_V        | Thalamus                           |                       | 4       | L_Hip_V        | Hippocampus            |          | 7       | R_Tha_V        | Thalamus               |
|                      | 11      | L_FMarG_S_V    | PFC (frontal pole)                 |                       | 7       | R_Tha_V        | Thalamus               |          | 27      | L_PRCG_V       | Precentral gyrus       |
|                      | 12      | L_TrFPoG_S_V   | PFC (frontal pole)                 |                       | 9       | R_Hip_V        | Hippocampus            |          | 67      | R_PRCG_V       | Precentral gyrus       |
|                      | 14      | L_MACgG_S_V    | aMCC                               |                       | 21      | L_LoInG_CInS_V | mpINS                  |          |         |                |                        |
|                      | 15      | L_MPosCgG_S_V  | pMCC                               |                       | 22      | L_ShoInG_V     | aINS                   | module 3 | 3       | L_Pu_V         | Putamen                |
|                      | 19      | L_MFG_V        | PFC (dIPFC)                        |                       | 42      | L_JS_V         | Inferior parietal lobe |          | 8       | R_Pu_V         | Putamen                |
|                      | 26      | L_PosCG_V      | Postcentral gyrus                  |                       | 62      | R_ShoInG_V     | aINS                   |          | 12      | L_TrFPoG_S_V   | PFC (frontal pole)     |
|                      | 27      | L_PRCG_V       | Precentral gyrus                   |                       |         |                |                        |          | 14      | L_MACgG_S_V    | aMCC                   |
|                      | 35      | L_CS_V         | Between pre- and postcentral gyrus |                       |         |                |                        |          | 18      | L_InfFGTrip_V  | PFC                    |
|                      | 39      | L_InfFS_V      | PFC                                | module 3              | 3       | L_Pu_V         | Putamen                |          | 19      | L_MFG_V        | PFC (dIPFC)            |
|                      | 41      | L_SupFS_V      | PFC                                |                       | 8       | R_Pu_V         | Putamen                |          | 20      | L_SupFG_V      | vmPFC/dmPFC/ SMA       |
|                      | 43      | L_IntPS_TrPS_V | Inferior parietal lobe             |                       |         |                |                        |          | 21      | L_LoInG_CInS_V | mpINS                  |
|                      | 46      | L_OrS_V        | PFC (OFC)                          | module 4              | 5       | L_Amg_V        | Amygdala               |          | 22      | L_ShoInG_V     | aINS                   |
|                      | 47      | L_PerCaS_V     | ACC/MCC                            |                       | 10      | R_Amg_V        | Amygdala               |          | 24      | L_AngG_V       | Inferior parietal lobe |
|                      | 51      | R_FMarG_S_V    | PFC (frontal pole)                 |                       | 13      | L_ACgG_S_V     | ACC                    |          | 28      | L_RG_V         | PFC (mOFC)             |
|                      | 52      | R_TrFPoG_S_V   | PFC (frontal pole)                 |                       | 53      | R_ACgG_S_V     | ACC                    |          | 32      | L_ALSHorp_V    | PFC                    |
|                      | 55      | R_MPosCgG_S_V  | pMCC                               |                       |         |                |                        |          | 36      | L_ACirIns_V    | aINS                   |
|                      | 59      | R_MFG_V        | PFC (dIPFC)                        | module 5              | 11      | L_FMarG_S_V    | PFC (frontal pole)     |          |         |                |                        |

| IBS low somatization |         |                |                        | IBS high somatization |         |                |                    | HC             |         |                |                        |
|----------------------|---------|----------------|------------------------|-----------------------|---------|----------------|--------------------|----------------|---------|----------------|------------------------|
| module               | node no | Node name      | Region                 | module                | node no | Node name      | Region             | module         | node no | Node name      | Region                 |
| Module 2 cont.       | 64      | R_AngG_V       | Inferior parietal lobe | module 5 cont.        | 14      | L_MACgG_S_V    | aMCC               | module 3 cont. | 38      | L_SupCirInS_V  | mINS                   |
|                      | 67      | R_PRCG_V       | Precentral gyrus       |                       | 15      | L_MPosCgG_S_V  | pMCC               |                | 41      | L_SupFS_V      | PFC                    |
|                      | 80      | R_MFS_V        | PFC                    |                       | 17      | L_InfFGOrp_V   | PFC (vIPFC)        |                | 42      | L_JS_V         | Inferior parietal lobe |
|                      | 81      | R_SupFS_V      | PFC                    |                       | 19      | L_MFG_V        | PFC (dIPFC)        |                | 43      | L_IntPS_TrPS_V | Inferior parietal lobe |
|                      | 83      | R_IntPS_TrPS_V | Inferior parietal lobe |                       | 20      | L_SupFG_V      | vmPFC/dmPFC/SMA    |                | 47      | L_PerCaS_V     | ACC/MCC                |
|                      | 86      | R_OrS_V        | PFC (OFC)              |                       | 23      | L_OrG_V        | PFC (IOFC)         |                | 52      | R_TrFPoG_S_V   | PFC (frontal pole)     |
|                      | 88      | R_SbOrS_V      | PFC (OFC)              |                       | 24      | L_AngG_V       | Inferior parietal  |                | 56      | R_InfFGOpp_V   | PFC                    |
|                      | 89      | R_SupTS_V      | Superior temporal      |                       | 25      | L_SuMarG_V     | Inferior parietal  |                | 57      | R_InfFGOrp_V   | PFC (vIPFC)            |
|                      | 90      | R_TrTs_V       | Superior temporal      |                       | 28      | L_RG_V         | PFC (mOFC)         |                | 58      | R_InfFGTrip_V  | PFC                    |
|                      |         |                |                        |                       | 32      | L_ALSHorp_V    | PFC                |                | 59      | R_MFG_V        | PFC (dIPFC)            |
| module 3             | 3       | L_Pu_V         | Putamen                |                       | 36      | L_ACirIns_V    | aINS               |                | 60      | R_SupFG_V      | vmPFC/dmPFC/SMA        |
|                      | 8       | R_Pu_V         | Putamen                |                       | 37      | L_InfCirIns_V  | pINS               |                | 61      | R_LoInG_CInS_V | mpINS                  |
|                      |         |                |                        |                       | 38      | L_SupCirInS_V  | mINS               |                | 62      | R_ShoInG_V     | aINS                   |
| module 4             | 4       | L_Hip_V        | Hippocampus            |                       | 43      | L_IntPS_TrPS_V | Inferior parietal  |                | 69      | R_SupTGLp_V    | Superior temporal      |
|                      | 5       | L_Amg_V        | Amygdala               |                       | 44      | L_LORs_V       | PFC (OFC)          |                | 73      | R_ALSVerp_V    | PFC                    |
|                      | 9       | R_Hip_V        | Hippocampus            |                       | 45      | L_MedOrS_V     | PFC (OFC)          |                | 78      | R_SupCirInS_V  | mINS                   |
|                      | 10      | R_Amg_V        | Amygdala               |                       | 46      | L_OrS_V        | PFC (OFC)          |                | 81      | R_SupFS_V      | PFC                    |
|                      | 17      | L_InfFGOrp_V   | PFC (vIPFC)            |                       | 47      | L_PerCaS_V     | ACC/MCC            | module 4       |         |                |                        |
|                      | 42      | L_JS_V         | Inferior parietal lobe |                       | 50      | L_TrTs_V       | Superior temporal  |                | 4       | L_Hip_V        | Hippocampus            |
|                      |         |                |                        |                       | 51      | R_FMarG_S_V    | PFC (frontal pole) |                | 5       | L_Amg_V        | Amygdala               |
| module 5             | 13      | L_ACgG_S_V     | ACC                    |                       | 52      | R_TrFPoG_S_V   | PFC (frontal pole) |                | 9       | R_Hip_V        | Hippocampus            |

| IBS low somatization |         |             |                                    | IBS high somatization |         |                |                   | HC             |         |               |                        |
|----------------------|---------|-------------|------------------------------------|-----------------------|---------|----------------|-------------------|----------------|---------|---------------|------------------------|
| module               | node no | Node name   | Region                             | module                | node no | Node name      | Region            | module         | node no | Node name     | Region                 |
| module 5 cont.       | 20      | L_SupFG_V   | vmPFC/dmPFC/SMA                    | module 5 cont.        | 54      | R_MACgG_S_V    | aMCC              | module 4 cont. | 10      | R_Amg_V       | Amygdala               |
|                      | 23      | L_OrG_V     | PFC (IOFC)                         |                       | 55      | R_MPosCgG_S_V  | pMCC              |                |         |               |                        |
|                      | 25      | L_SuMarG_V  | Inferior parietal lobe             |                       | 57      | R_InfFGOrp_V   | PFC (vlPFC)       | module 5       | 11      | L_FMarG_S_V   | PFC (frontal pole)     |
|                      | 28      | L_RG_V      | PFC (mOFC)                         |                       | 59      | R_MFG_V        | PFC (dlPFC)       |                | 13      | L_ACgG_S_V    | ACC                    |
|                      | 29      | L_SupTGLp_V | Superior temporal                  |                       | 60      | R_SupFG_V      | vmPFC/dmPFC/SMA   |                | 15      | L_MPosCgG_S_V | pMCC                   |
|                      | 30      | L_PoPI_V    | Superior temporal                  |                       | 61      | R_LoInG_CInS_V | mpINS             |                | 16      | L_InfFGOpp_V  | PFC                    |
|                      | 44      | L_LORs_V    | PFC (OFC)                          |                       | 63      | R_OrG_V        | PFC (IOFC)        |                | 23      | L_OrG_V       | PFC (IOFC)             |
|                      | 45      | L_MedOrS_V  | PFC (OFC)                          |                       | 65      | R_SuMarG_V     | Inferior parietal |                | 25      | L_SuMarG_V    | Inferior parietal lobe |
|                      | 48      | L_SbOrS_V   | PFC (OFC)                          |                       | 69      | R_SupTGLp_V    | Superior temporal |                | 29      | L_SupTGLp_V   | Superior temporal      |
|                      | 50      | L_TrTs_V    | Superior temporal                  |                       | 76      | R_ACirIns_V    | aINS              |                | 30      | L_PoPI_V      | Superior temporal      |
|                      | 53      | R_ACgG_S_V  | ACC                                |                       | 77      | R_InfCirIns_V  | pINS              |                | 31      | L_TPI_V       | Superior temporal      |
|                      | 54      | R_MACgG_S_V | aMCC                               |                       | 78      | R_SupCirIns_V  | mINS              |                | 33      | L_ALSVerp_V   | PFC                    |
|                      | 60      | R_SupFG_V   | vmPFC/dmPFC/SMA                    |                       | 80      | R_MFS_V        | PFC               |                | 34      | L_PosLS_V     | Inferior parietal lobe |
|                      | 63      | R_OrG_V     | PFC (IOFC)                         |                       | 83      | R_IntPS_TrPS_V | Inferior parietal |                | 37      | L_InfCirIns_V | pINS                   |
|                      | 66      | R_PosCG_V   | Postcentral gyrus                  |                       | 85      | R_MedOrS_V     | PFC (OFC)         |                | 39      | L_InfFS_V     | PFC                    |
|                      | 68      | R_RG_V      | PFC (mOFC)                         |                       | 86      | R_OrS_V        | PFC (OFC)         |                | 40      | L_MFS_V       | PFC                    |
|                      | 69      | R_SupTGLp_V | Superior temporal                  |                       | 87      | R_PerCaS_V     | ACC/MCC           |                | 44      | L_LORs_V      | PFC (OFC)              |
|                      | 71      | R_TPI_V     | Superior temporal                  |                       | 88      | R_SbOrS_V      | PFC (OFC)         |                | 45      | L_MedOrS_V    | PFC (OFC)              |
|                      | 74      | R_PosLS_V   | Inferior parietal lobe             |                       | 90      | R_TrTs_V       | Superior temporal |                | 48      | L_SbOrS_V     | PFC (OFC)              |
|                      | 75      | R_CS_V      | Between Pre- and postcentral gyrus |                       |         |                |                   |                | 49      | L_SupTS_V     | Superior temporal      |

| IBS low somatization |         |                |                        | IBS high somatization |         |               |                        | HC             |         |                |                        |
|----------------------|---------|----------------|------------------------|-----------------------|---------|---------------|------------------------|----------------|---------|----------------|------------------------|
| module               | node no | Node name      | Region                 | module                | node no | Node name     | Region                 | module         | node no | Node name      | Region                 |
| module 5 cont.       | 79      | R_InfFS_V      | PFC                    | module 6              | 16      | L_InfFGOpp_V  | PFC                    | module 5 cont. | 50      | L_TrTs_V       | Superior temporal      |
|                      | 82      | R_JS_V         | Inferior parietal lobe |                       | 29      | L_SupTGLp_V   | Superior temporal      |                | 51      | R_FMarG_S_V    | PFC (frontal pole)     |
|                      | 84      | R_LORs_V       | PFC (OFC)              |                       | 31      | L_TPI_V       | Superior temporal      |                | 53      | R_ACgG_S_V     | ACC                    |
|                      | 85      | R_MedOrS_V     | PFC (OFC)              |                       | 34      | L_PosLS_V     | Inferior parietal lobe |                | 54      | R_MACgG_S_V    | aMCC                   |
|                      | 87      | R_PerCaS_V     | ACC/MCC                |                       | 40      | L_MFS_V       | PFC                    |                | 55      | R_MPosCgG_S_V  | pMCC                   |
|                      |         |                |                        |                       | 56      | R_InfFGOpp_V  | PFC                    |                | 68      | R_RG_V         | PFC (mOFC)             |
| module 6             | 16      | L_InfFGOpp_V   | PFC                    |                       | 71      | R_TPI_V       | Superior temporal      |                | 70      | R_PoPI_V       | Superior temporal      |
|                      | 18      | L_InfFGTrip_V  | PFC                    |                       | 74      | R_PosLS_V     | Inferior parietal lobe |                | 71      | R_TPI_V        | Superior temporal      |
|                      | 24      | L_AngG_V       | Inferior parietal lobe |                       | 81      | R_SupFS_V     | PFC                    |                | 72      | R_ALSHorp_V    | PFC                    |
|                      | 33      | L_ALSVerp_V    | PFC                    |                       |         |               |                        |                | 74      | R_PosLS_V      | Inferior parietal lobe |
|                      | 38      | L_SupCirInS_V  | mINS                   | module 7              | 18      | L_InfFGTrip_V | PFC                    |                | 76      | R_ACirIns_V    | aINS                   |
|                      | 40      | L_MFS_V        | PFC                    |                       | 30      | L_PoPI_V      | Superior temporal      |                | 77      | R_InfCirIns_V  | pINS                   |
|                      | 49      | L_SupTS_V      | Superior temporal      |                       | 33      | L_ALSVerp_V   | PFC                    |                | 79      | R_InfFS_V      | PFC                    |
|                      | 56      | R_InfFGOpp_V   | PFC                    |                       | 39      | L_InfFS_V     | PFC                    |                | 80      | R_MFS_V        | PFC                    |
|                      | 61      | R_LoInG_CInS_V | mpINS                  |                       | 48      | L_SbOrS_V     | PFC (OFC)              |                | 82      | R_JS_V         | Inferior parietal lobe |
|                      | 65      | R_SuMarG_V     | Inferior parietal lobe |                       | 49      | L_SupTS_V     | Superior temporal      |                | 83      | R_IntPS_TrPS_V | Inferior parietal lobe |
|                      | 78      | R_SupCirInS_V  | mINS                   |                       | 58      | R_InfFGTrip_V | PFC                    |                | 84      | R_LORs_V       | PFC (OFC)              |
|                      |         |                |                        |                       | 70      | R_PoPI_V      | Superior temporal      |                | 85      | R_MedOrS_V     | PFC (OFC)              |
|                      |         |                |                        |                       | 72      | R_ALSHorp_V   | PFC                    |                | 87      | R_PerCaS_V     | ACC/MCC                |
|                      |         |                |                        |                       | 73      | R_ALSVerp_V   | PFC                    |                | 88      | R_SbOrS_V      | PFC (OFC)              |
| module 7             | 21      | L_LoInG_CInS_V | mpINS                  |                       |         |               |                        |                |         |                |                        |
|                      | 22      | L_ShoInG_V     | aINS                   |                       |         |               |                        |                |         |                |                        |

| IBS low somatization |         |               |                        | IBS high somatization |         |           |                                   | HC             |         |              |                                   |
|----------------------|---------|---------------|------------------------|-----------------------|---------|-----------|-----------------------------------|----------------|---------|--------------|-----------------------------------|
| module               | node no | Node name     | Region                 | module                | node no | Node name | Region                            | module         | node no | Node name    | Region                            |
| module 7 cont.       | 32      | L_ALSHorp_V   | PFC                    | module 7 cont.        | 79      | R_InfFS_V | PFC                               | module 5 cont. | 90      | R_TrTs_V     | Superior temporal                 |
|                      | 36      | L_ACirIns_V   | aINS                   |                       | 82      | R_JS_V    | Inferior parietal                 |                |         |              |                                   |
|                      | 37      | L_InfCirIns_V | pINS                   |                       | 84      | R_LORs_V  | PFC (OFC)                         | module 6       | 17      | L_InfFGOrp_V | PFC (vIPFC)                       |
|                      | 57      | R_InfFGOrp_V  | PFC (vIPFC)            | module 8              |         |           |                                   |                |         |              |                                   |
|                      | 58      | R_InfFGTrip_V | PFC                    |                       | 26      | L_PosCG_V | Postcentral gyrus                 | module 7       | 26      | L_PosCG_V    | Postcentral gyrus                 |
|                      | 62      | R_ShoInG_V    | aINS                   |                       | 27      | L_PRCG_V  | Precentral gyrus                  |                | 35      | L_CS_V       | Between pre-and postcentral gyrus |
|                      | 70      | R_PoPl_V      | Superior temporal      |                       | 35      | L_CS_V    | Between pre-and postcentral gyrus |                | 46      | L_OrS_V      | PFC (OFC)                         |
|                      | 72      | R_ALSHorp_V   | PFC                    |                       | 41      | L_SupFS_V | PFC                               |                | 63      | R_OrG_V      | PFC (lOFC)                        |
|                      | 73      | R_ALSVerp_V   | PFC                    |                       | 66      | R_PosCG_V | Postcentral gyrus                 |                | 66      | R_PosCG_V    | Postcentral gyrus                 |
|                      | 76      | R_ACirIns_V   | aINS                   |                       | 67      | R_PRCG_V  | Precentral gyrus                  |                | 75      | R_CS_V       | Between pre-and postcentral gyrus |
|                      | 77      | R_InfCirIns_V | pINS                   |                       | 68      | R_RG_V    | PFC (mOFC)                        |                | 86      | R_OrS_V      | PFC (OFC)                         |
|                      |         |               |                        |                       | 75      | R_CS_V    | Between pre-and postcentral gyrus |                |         |              |                                   |
|                      |         |               |                        |                       |         |           |                                   |                |         |              |                                   |
| module 8             | 31      | L_TPI_V       | Superior temporal      | module 9              |         |           |                                   | module 8       | 64      | R_AngG_V     | Inferior parietal lobe            |
|                      | 34      | L_PosLS_V     | Inferior parietal lobe |                       | 64      | R_AngG_V  | Inferior parietal lobe            |                | 89      | R_SupTS_V    | Superior temporal                 |
|                      |         |               |                        |                       | 89      | R_SupTS_V | Superior temporal                 |                |         |              |                                   |

Supplementary Table S7: Modularity structure
